# Supplementary material
Source: publisher figshare collection journal article supplement (https://gsapubs.figshare.com/ndownloader/files/22739528)
Supplement: Supplementary file 1 [file 22739528]

GSA Data Repository Item # 7615

Title of article Partial fusion along the Alpine fault zone

Author(s) Wallace, R. C.

see GSA Bulletin v. 87, p. 1225 - 1228

Contents 4 p.

|                      |      |
|----------------------|------|
| Analytical prodedure | p. 1 |
| Table 1              | 2    |
| Table 2              | 3    |
| References cited     | 4    |
|                      |      |
|                      |      |
|                      |      |
|                      |      |
|                      |      |

## APPENDIX I. Analytical procedure

Analyses were performed on an electron microprobe with a beam diameter of 20 microns; a specimen current of 0.03 micro amps; using an accelerating voltage of 15 kv. Counts were accumulated for ten seconds with standards of hematite ( $\text{FeO}$ ), periclase ( $\text{MgO}$ ), wollastonite ( $\text{SiO}_2, \text{CaO}$ ), albite ( $\text{Na}_2\text{O}$ ), adularia ( $\text{K}_2\text{O}$ ), manganosite ( $\text{MnO}$ ), corundum ( $\text{Al}_2\text{O}_3$ ), and rutile ( $\text{TiO}_2$ ) using the Bence and Albee (1968), Albee and Ray (1970) and Sweatman and Long (1969) data reduction methods and corrections.

Difficulty was encountered in the stability of soda under the electron beam (see also Borom and Haunemann, 1967; Busch and others, 1974). Tests with a beam diameter of 2-3 microns; 10 seconds counting time with approximately 4 seconds between counts and a stationary beam showed successive losses in counts of 36%, 21%, 11% between the first four count times over approximately 52 seconds. During the same time silica showed a variation of  $\pm 3\%$  on the mean. Using the defocussed beam, analysing soda first and ensuring that the beam was only positioned on the glass immediately prior to counting reduced this error to within the natural limits of machine and sample.

Table 1. Analyses of ultramylonite and hyalomylonite from the  
Alpine Fault Zone and from the Himalayas

| Sample                         | 46A  | 46B  | 54A   | 54B   | 54C   | 55A   | 55B   | 55C   | A    | B    |
|--------------------------------|------|------|-------|-------|-------|-------|-------|-------|------|------|
|                                | hy   | hy   | dou   | lou   | mu    | dou   | lou   | mu    | hy   | hy   |
| SiO <sub>2</sub>               | 62.2 | 67.2 | 46.0  | 43.4  | 56.4  | 49.2  | 45.6  | 56.1  | 60.3 | 64.3 |
| Al <sub>2</sub> O <sub>3</sub> | 15.8 | 14.5 | 20.3  | 17.7  | 14.40 | 20.1  | 18.0  | 14.48 | 17.6 | 18.0 |
| TiO <sub>2</sub>               | 0.98 | 0.92 | 1.64  | 1.18  | 1.37  | 1.60  | 1.45  | 1.46  | 0.82 | 0.23 |
| FeO*                           | 7.42 | 6.53 | 10.91 | 14.23 | 8.83  | 11.67 | 12.83 | 8.83  | 5.34 | 2.85 |
| MnO                            | 0.19 | 0.11 | 0.28  | 0.22  | 0.13  | 0.18  | 0.21  | 0.14  | 0.06 | 0.04 |
| MgO                            | 2.05 | 1.75 | 4.63  | 0.87  | 4.20  | 4.74  | 7.07  | 4.17  | 2.06 | 1.03 |
| CaO                            | 4.37 | 3.62 | 6.30  | 3.51  | 5.59  | 5.65  | 8.19  | 5.27  | 1.73 | 1.60 |
| Na <sub>2</sub> O              | 2.17 | 1.79 | 3.51  | 2.86  | 0.78  | 3.76  | 3.07  | 0.80  | 2.63 | 2.86 |
| K <sub>2</sub> O               | 2.42 | 2.00 | 1.64  | 1.70  | 6.91  | 1.95  | 1.28  | 7.42  | 4.50 | 5.25 |
|                                | 97.6 | 98.4 | 95.2  | 94.7  | 98.6  | 98.8  | 97.7  | 98.7  | 94.8 | 95.9 |

\* Total iron as FeO,

hy Hyalomylonite,

dou Dark brown opaque ultr<sup>a</sup><sub>k</sub>mylonite,

lou Light brown opaque ultramylonite,

mu Microlitic ultramylonite.

Samples 46, 54 and 55 are from the Alpine Fault Zone; samples A and B are the darker and lighter Himalayan hyalomylonite respectively.

46A is an hyalomylonite analysis that best represents the average of 15 analyses.

46B is optically identical to 46A but has a significantly different composition.

TABLE 2. RELATIONSHIP MEASURED IN BARS BETWEEN STRESS AND DISPLACEMENT FOR MOVEMENTS ON THE ALPINE FAULT

| D*  | $\sigma^{\dagger}$ | $\sigma_f^{\S}$ | $\sigma_o^{\#}$ |
|-----|--------------------|-----------------|-----------------|
| 30  | 210-20             | 40-150          | 250             |
| 100 | 110-15             | 30-90           | 140             |
| 300 | 80-10              | 20-90           | 100             |
| 600 | 75-5               | 15-40           | 90              |

Note: Variation in  $\sigma$  and  $\sigma_f$  result from frictional stresses taken as varying proportions of total stress.

\* D is displacement on the fault in centimetres.

$\dagger \sigma = \sigma_o - \sigma_f$ .

$\S \sigma_f$  is frictional shearing stress (bars).

$\# \sigma_o$  is total shearing stress (bars).

REFERENCES CITED

- Albee, A. L., and Ray, L., 1970, Correction factors for electron probe microanalysis of silicates, oxides, carbonates, phosphates and sulphates: Anal. Chemistry, v. 42, p. 1408-1414.
- Bence, A., and Albee, A. L., 1968, Empirical correction factors for the electron microanalysis of silicates and oxides: Jour. Geology, V. 76, p. 382-403.
- Borom, M. P., and Haunemann, R. E., 1967, Local compositional changes in alkali silicate glasses during electron microprobe analysis: Jour. Appl. Physics, v. 38, p. 2406-2407.
- Sweatman, T. R., and Long, J. V. P., 1969, Quantitative electron-probe microanalysis of rock-forming minerals: Jour. Petrology, v. 10, p. 332-379.
